# Supplementary material for: Tetra(4-carboxyphenyl)porphyrin for efficient cofactor regeneration under visible light and its immobilization
Source: Royal Society of Chemistry journal article supplement (doi:10.1039/c8cy00320c), 2018-01-01
Supplement: c8cy00320c1.pdf [file c8cy00320c1.pdf]

**Electronic Supplementary Material (ESI) for Catalysis Science & Technology**

**Supporting Information**

**Tetra(4-carboxyphenyl)porphyrin for Efficient Cofactor  
Regeneration under Visible Light and Its Immobilization**

Yanzi Wang, Jing Sun, Haohai Zhang, Zhiping Zhao, Wenfang Liu\*

School of Chemistry and Chemical Engineering, Beijing Institute of Technology,

Beijing 102488, China

\*Email: liuwenfang@bit.edu.cn

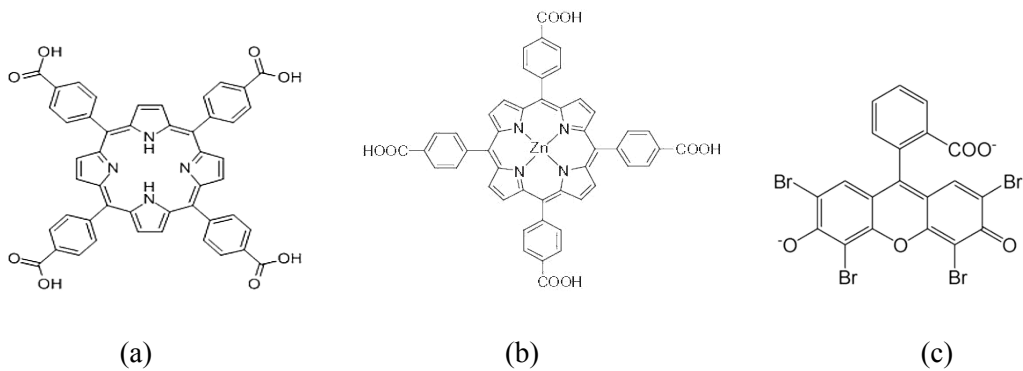

**Scheme S1** Molecular structures of (a) TCPP, (b) ZnTCPP and (c) EY.

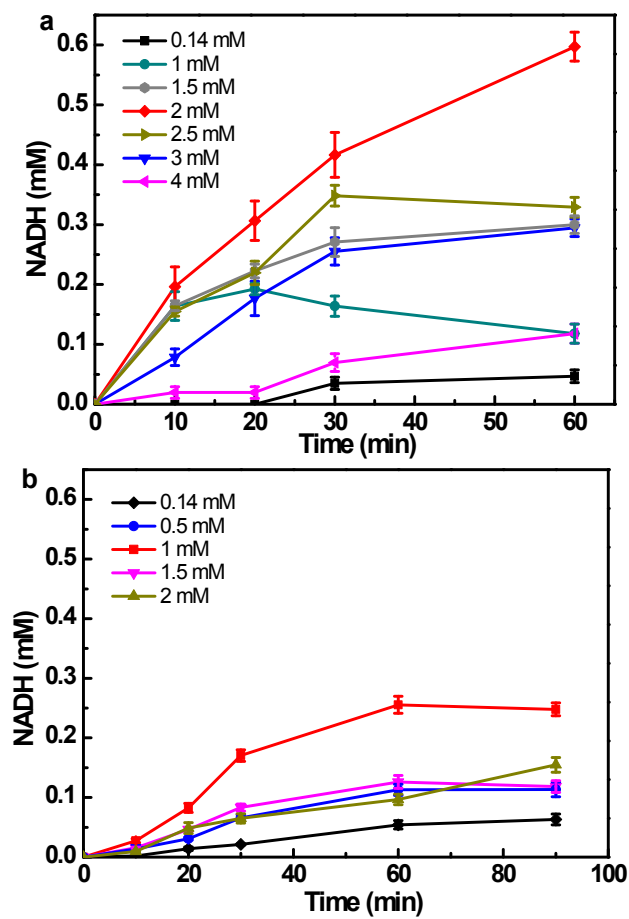

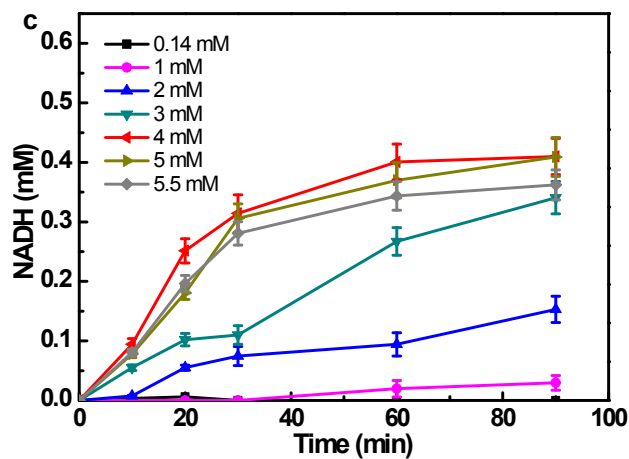

**Fig. S1** Reaction kinetic curves of visible light-driven NADH regeneration using (a) TCPP, (b) ZnTCPP or (c) EY as a photosensitizer. TEOA concentration was 1 mM.

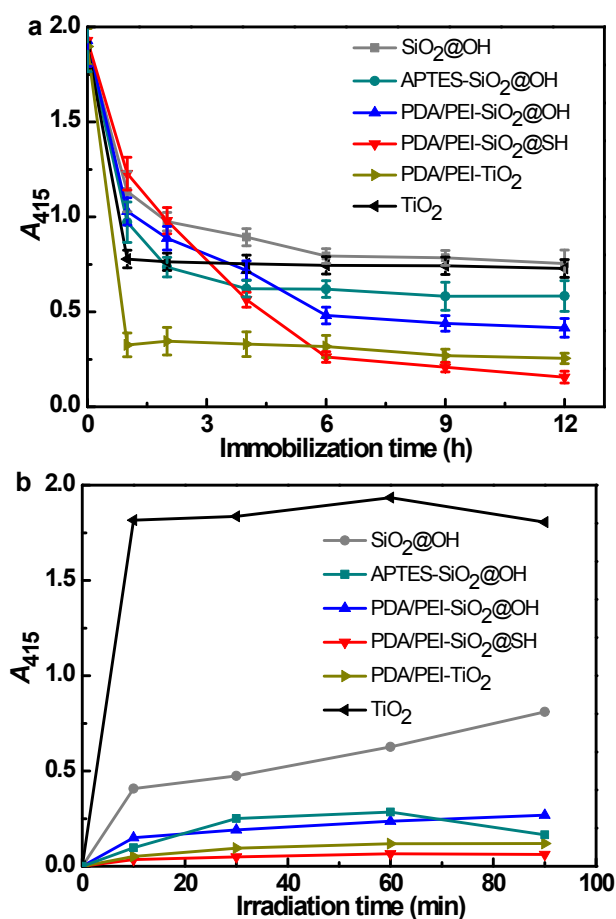

**Fig. S2** Change in the value of  $A_{415}$  (a) in the process of TCPP adsorption on different supports and (b) for different immobilized TCPP systems with the regeneration reaction proceeded.

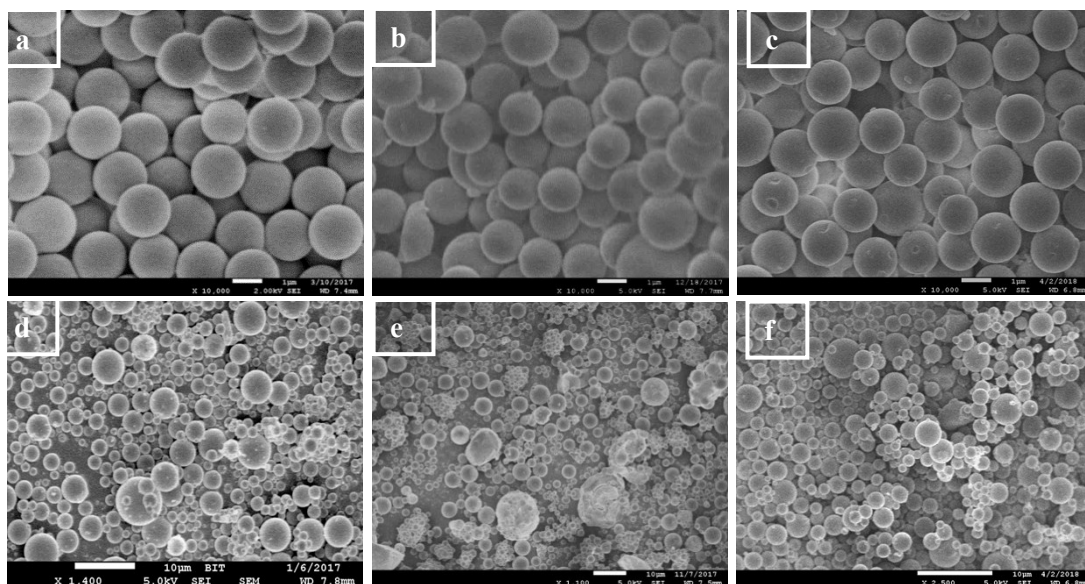

**Fig. S3** SEM photos of (a)  $\text{SiO}_2\text{@SH}$ , (b)  $\text{PDA/PEI-SiO}_2\text{@SH}$ , (c)  $\text{TCPP-PDA/PEI-SiO}_2\text{@SH}$ , (d)  $\text{SiO}_2\text{@OH}$ , (e)  $\text{PDA/PEI-SiO}_2\text{@OH}$  and (f)  $\text{TCPP-PDA/PEI-SiO}_2\text{@OH}$ .

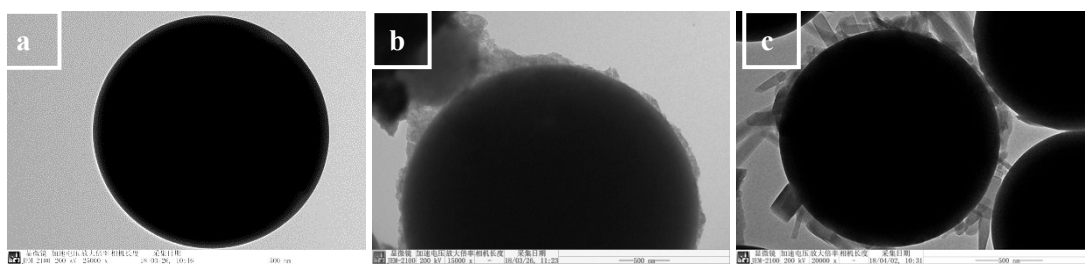

**Fig. S4** TEM photos of (a)  $\text{SiO}_2\text{@SH}$ , (b)  $\text{PDA/PEI-SiO}_2\text{@SH}$  and (c)  $\text{TCPP-PDA/PEI-SiO}_2\text{@SH}$ .

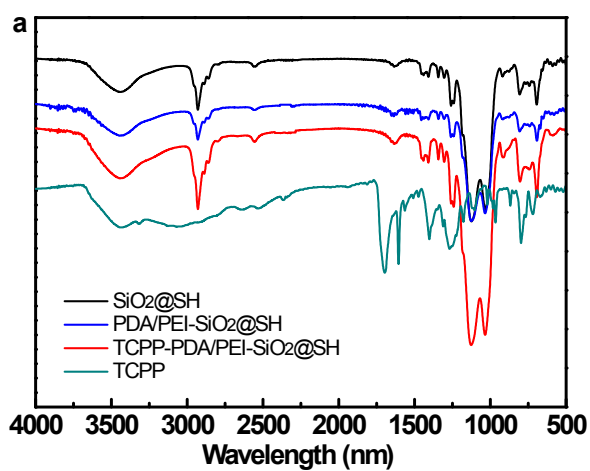

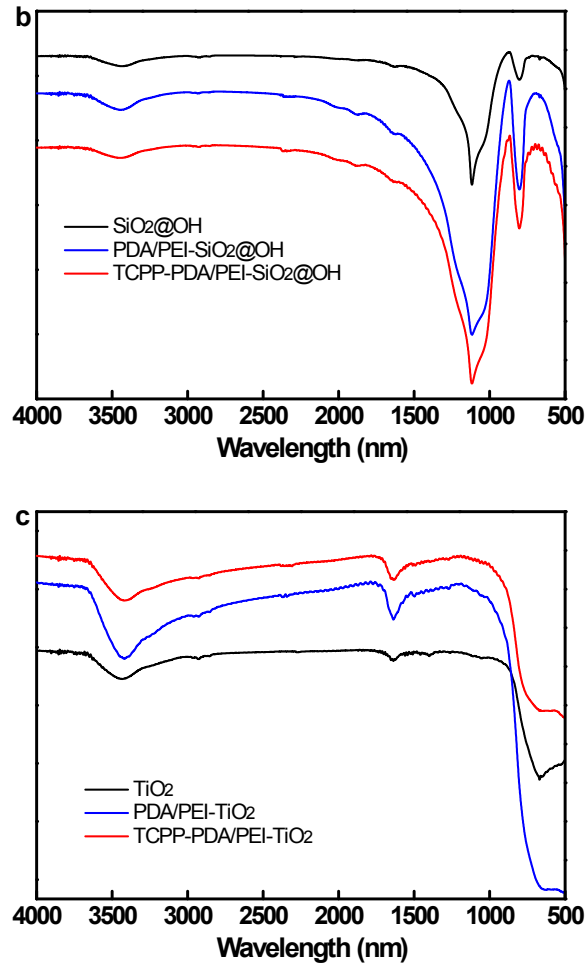

**Fig. S5** FTIR spectra of (a) SiO<sub>2</sub>@SH, (b) SiO<sub>2</sub>@OH and (c) TiO<sub>2</sub> after PDA/PEI modification and TCPP adsorption.

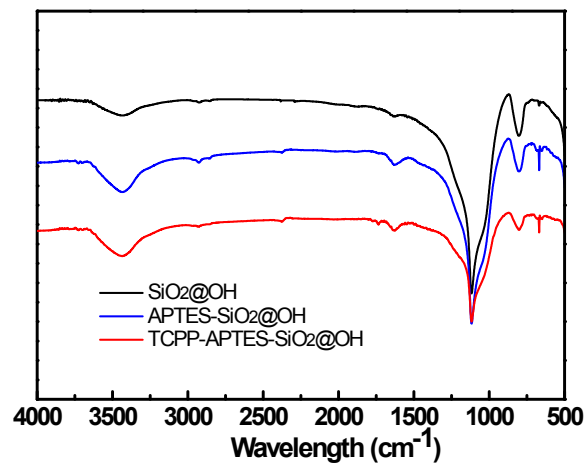

**Fig. S6** FTIR spectra of SiO<sub>2</sub>@OH microspheres after APTES modification and TCPP adsorption.

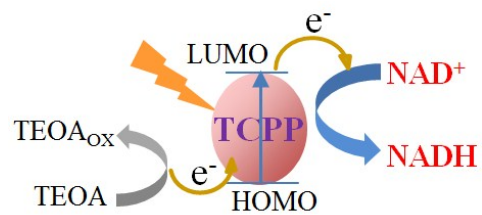

**Scheme 2** Schematic diagram of a visible light-driven NADH regeneration system in the presence of TCPP with TEOA as an electron donor. HOMO and LUMO are the highest occupied molecular orbital and lowest unoccupied molecular orbital, respectively.
